# Supplementary material for: Quality of Life: Psychological Symptoms—Effects of a 2-Month Healthy Diet and Nutraceutical Intervention; A Randomized, Open-Label Intervention Trial (RISTOMED)
Source: PubMed Central journal article supplement (PMC7146172; doi:10.3390/nu12030800), 2020-03-18

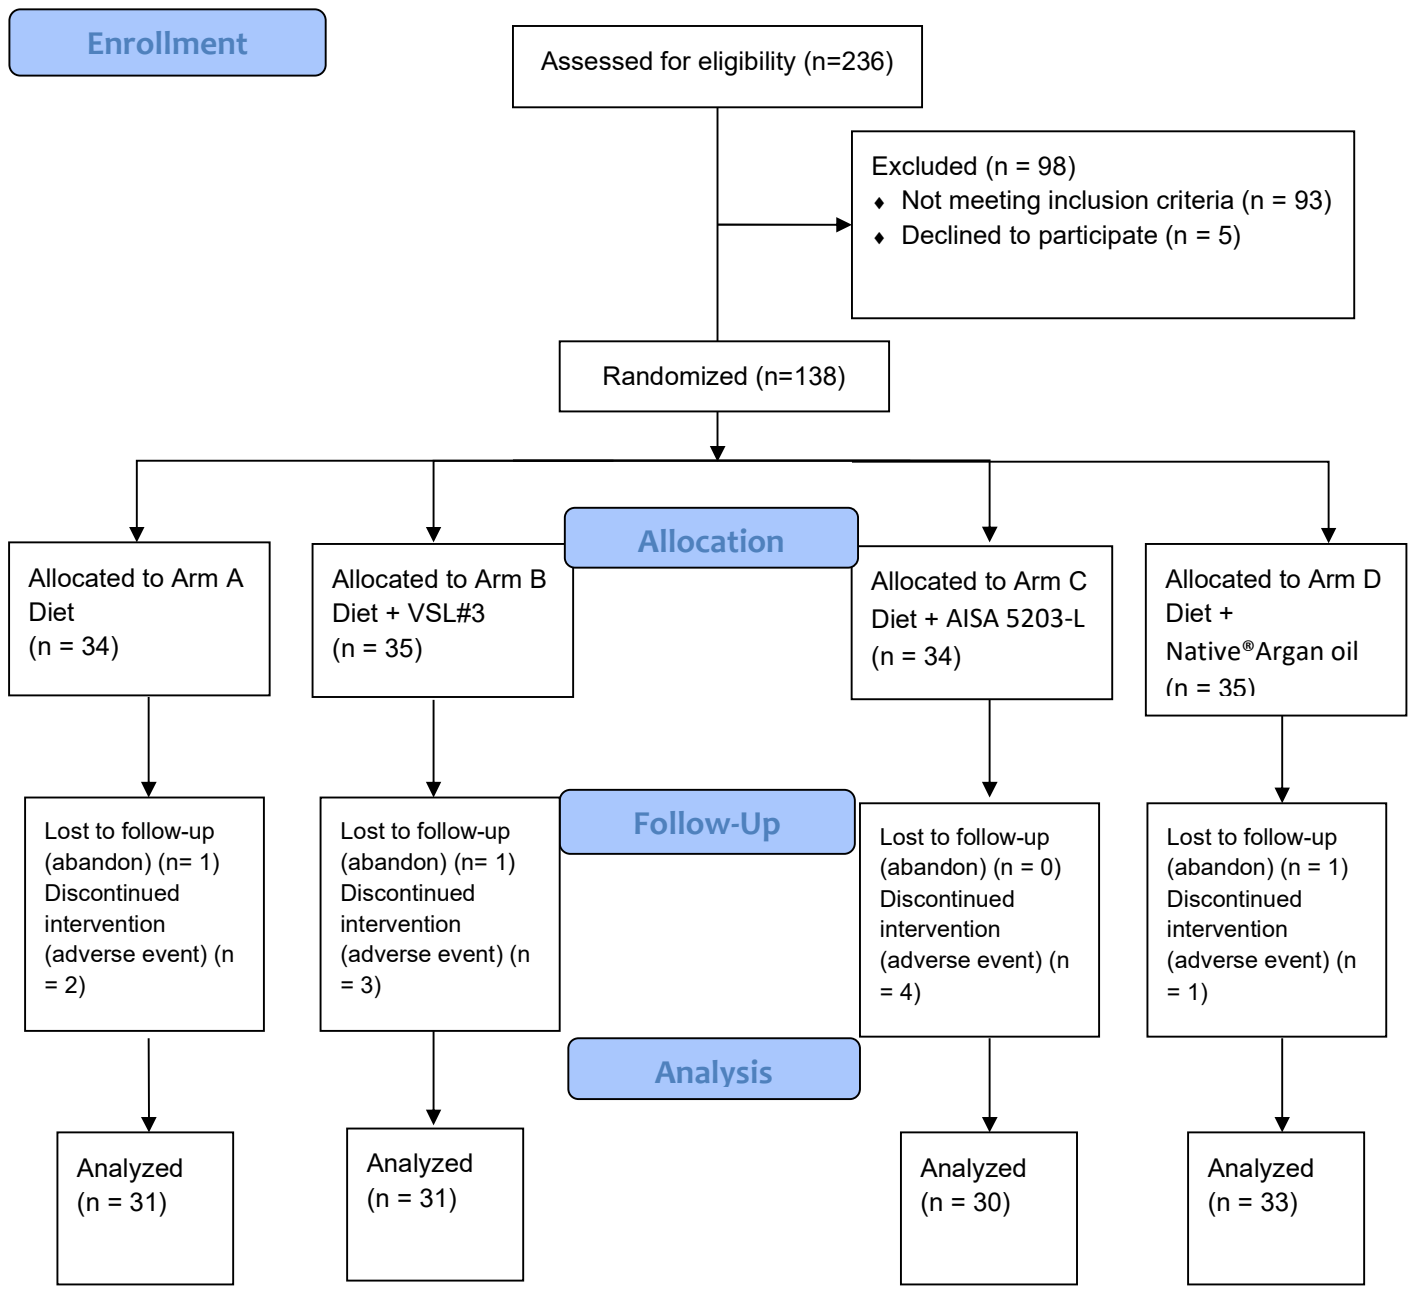

Supplement: nutrients-12-00800-s001.pdf [file nutrients-12-00800-s001.pdf]
